# Supplementary material
Source: PubMed Central journal article supplement (PMC2844157)

### **Supplementary Figure 1**

MALDI-TOF mass spectrometry and analytical HPLC of purified fluorescein-labeled peptides. **A.** Analytical HPLC of Tailpiece<sub>1946-2000</sub>. **B.** Mass spectrum of Tailpiece<sub>1946-2000</sub>. **C.** Analytical HPLC of Tailpiece<sub>1954-2000</sub>. **D.** Mass spectrum of Tailpiece<sub>1954-2000</sub>.

### **Supplementary Figure 2**

In-vitro self-assembly of IIC-Rod<sub>1296-1854</sub>. IIC-Rod<sub>1296-1854</sub>, was expressed and purified from E. coli as described in Experimental Procedures. 0.1 mg/ml protein was dialyzed against different NaCl concentrations and the extent of assembly was calculated as the percentage of IIC-Rod<sub>1296-1854</sub> remaining in the supernatant after high speed centrifugation. Results are averages  $\pm$ S.D. of at least three independent experiments.

### **Supplementary Figure 3**

Secondary structural analysis of IIC-Rod<sub>1296-1854</sub> in the presence of tailpiece peptides. **A.** Fingerprint region of the TOCSY spectra of the positively charged Tailpiece<sub>1946-1967</sub> in the presence (red) and absence (black) of IIC-Rod<sub>1296-1854</sub>. Note that the spectra of the Tailpiece<sub>1946-1967</sub> in the presence of IIC-Rod<sub>1296-1854</sub> is not visible as it sedimented out of solution. **B.** Fingerprint region of the TOCSY spectra of the negatively charged Tailpiece<sub>1968-2000</sub> in the presence (red) and absence (black) of IIC-Rod<sub>1296-1854</sub>.

### **Supplementary Figure 4**

Secondary structural analysis of IIC-Rod<sub>1296-1854</sub> with the traditional Tailpiece<sub>1954-2000</sub>. CD spectra of IIC-Rod<sub>1296-1854</sub> incubated with increasing concentrations of the Tailpiece<sub>1954-2000</sub>. Brown, IIC-Rod<sub>1296-1854</sub> only; blue, IIC-Rod<sub>1296-1854</sub> and Tailpiece<sub>1954-2000</sub> at 1:1 ratio; red, 1:2 ratio; green, 1:4 ratio and orange, 1:10 ratio.

### **Supplementary Figure 5**

CD experiments assessing the stability over time of IIC-Rod<sub>1296-1854</sub> in the presence of the positively charged Tailpieces at 1:1 ratio **A.** IIC-Rod<sub>1296-1854</sub> with Tailpiece<sub>1946-1952</sub>. **B.** IIC-Rod<sub>1296-1854</sub> with Tailpiece<sub>1953-1967</sub>. Brown line, IIC-Rod<sub>1296-1854</sub> alone; Black line, IIC-Rod<sub>1296-1854</sub> and Tailpiece(s) that were collected after 0 minutes; Red line, after 1

min.; Blue line, after 5 min.; Green line, after 10 min.; Magenta line after 15 min.; Light blue line after 30 min.; Light green line, after 1 h and Orange line, after 2 h.

# Supplementary Figure 1

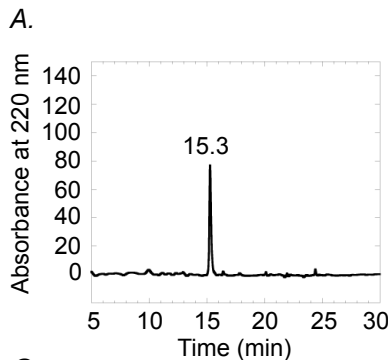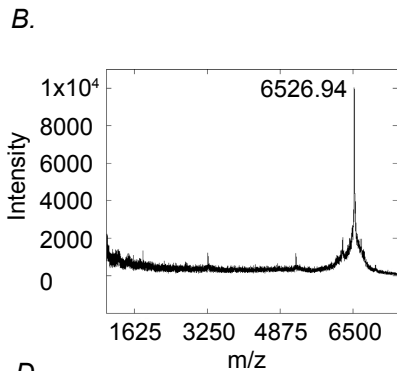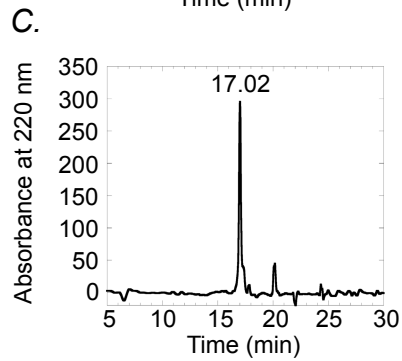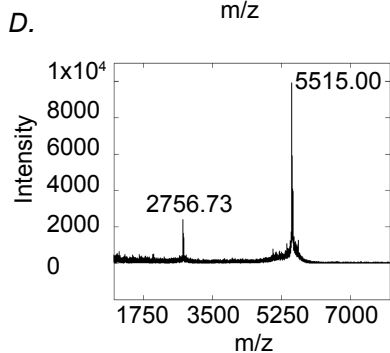

Supplementary Figure 2

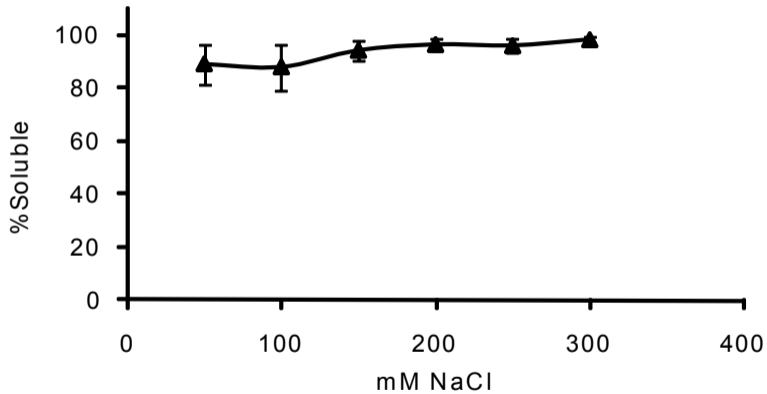

# Supplementary Figure 3

**A.**

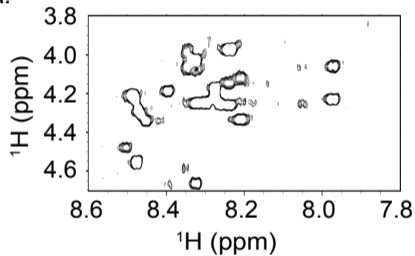

**B.**

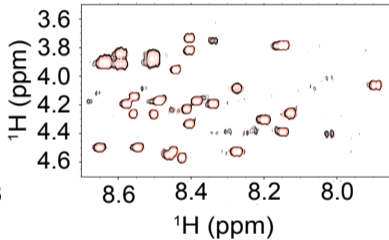

Supplementary Figure 4

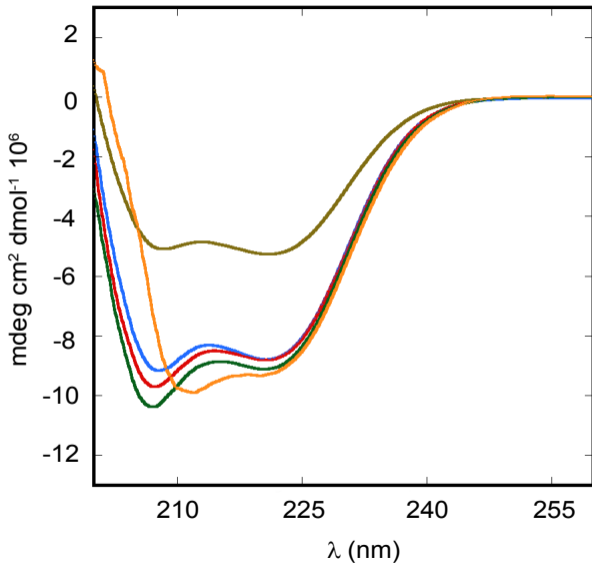

Supplementary Figure 5

A.

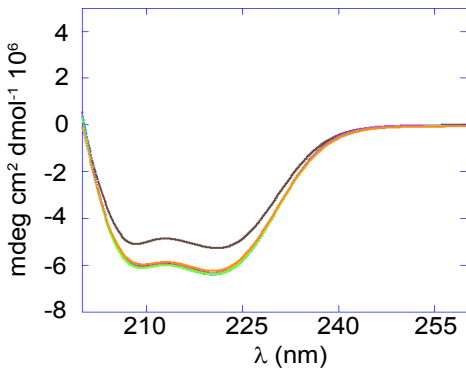

B.

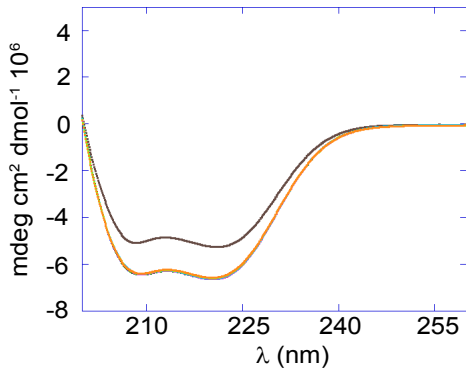

Supplement: supp_M109.049221_jbc.M109.049221-1.pdf [file supp_M109.049221_jbc.M109.049221-1.pdf]
